# Supplementary material
Source: PubMed Central journal article supplement (PMC5312699)

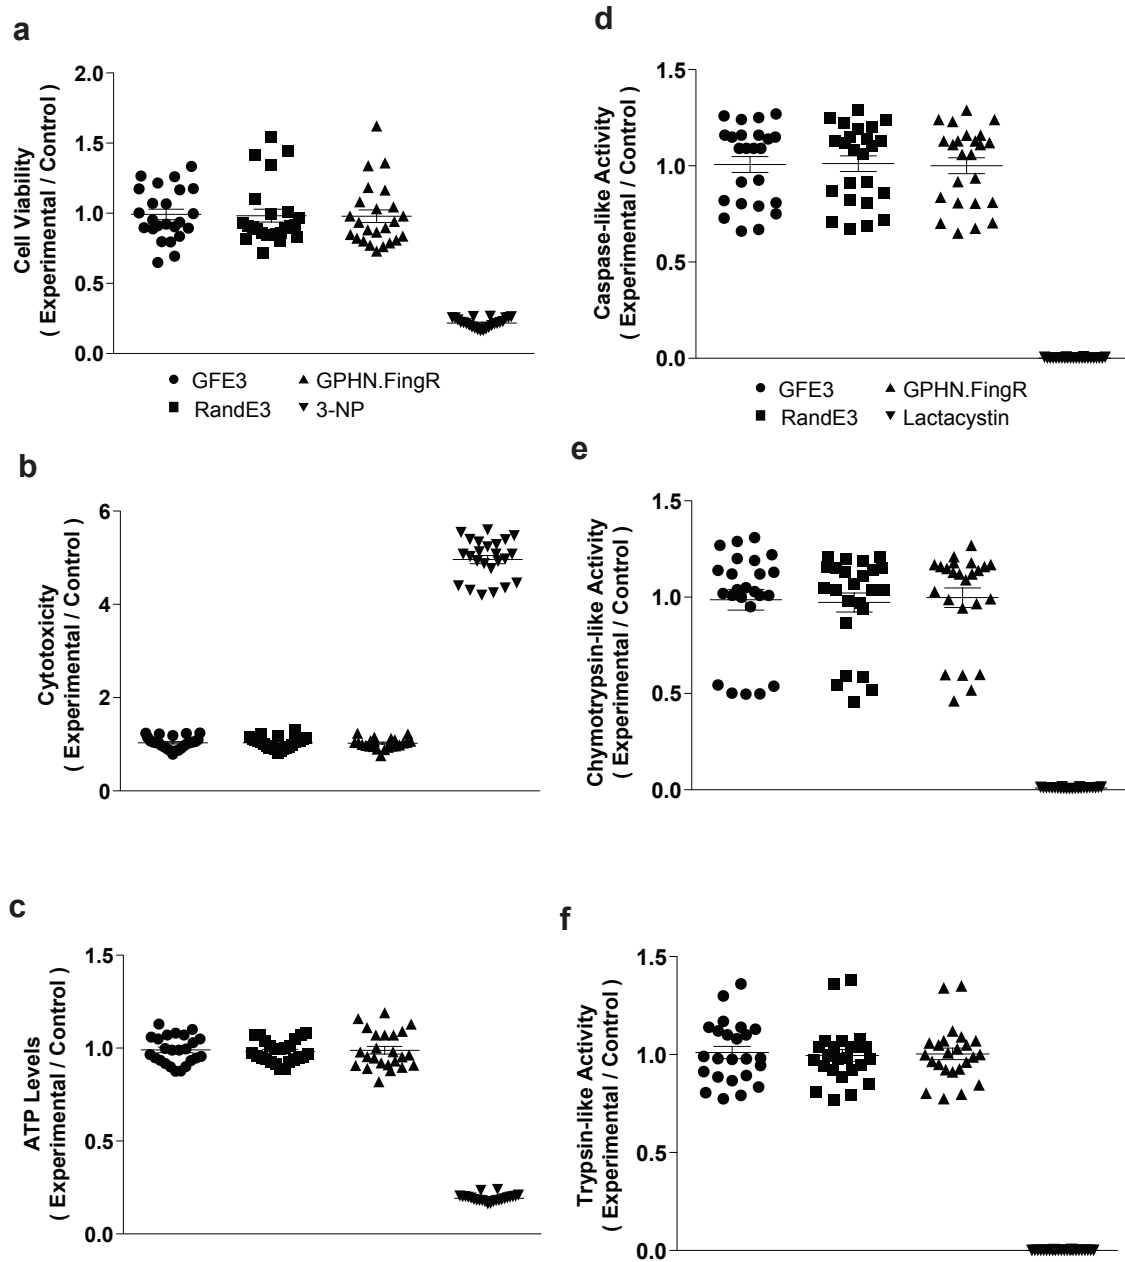

Supplement: NIHMS836408-supplement-Supplementary_Figure_5.pdf [file NIHMS836408-supplement-Supplementary_Figure_5.pdf]
